# Supplementary material for: Evaluation of a Genus Specific rGroEL 1-524 IgM-ELISA and Commercially ELISA Kits During Course of Leptospirosis in Thailand
Source: Research Square preprint supplement (doi:10.21203/rs.3.rs-352195/v1), 2021-03-30
Supplement: Supplementary file 1 [file 15b1f594a54ff89cd7387e75.doc]

**Title of the manuscript:** Evaluation of a prototype genus specific rGroEL1-524 -based IgM-ELISA and two commercially Panbio IgM-ELISA and Virion-Serion IgG-ELISA kits during course of leptospirosis in Thailand.

**Author List:** Santi Maneewatchararangsri, Galayanee Doungchawee, Thareerat Kalambaheti, Viravarn Luvira, Ngamphol Soonthornworasiri, Pisut Vattanatham,

Urai Chaisri, Poom Adisakwattana.

**Table 1.** Diagnostic accuracy of rGroEL1-524 IgM-ELISA using culture and/or MAT as reference standard during the course of leptospirosis.

| **Parameters** | **No./Total** | **IgM reactivity1** | **Percentage (95% CI)** |
| --- | --- | --- | --- |
| **Sensitivity: Leptospirosis paired sera** | | | |
| Culture positive | 47/49 | 0.37 (0.06-0.92) | 95.9% (85.2-99.5) |
| Single MAT1:400 | 15/17 | 0.47 (0.13-0.78) | 88.2% (66.8-98.6) |
| Seroconversion | 52/57 | 0.45 (0.13-1.01) | 91.2% (85.4-99.9) |
| **Specificity** |  |  |  |
| Non-endemic healthy & AUFI | 37/40 | 0.03 (0-0.22) | 92.5% (79.6-98.4) |
| Other febrile illness sera | 39/54 | 0.08 (0-1.07) | 72.2% (58.4-83.5) |
| Other febrile illness whole blood | 50/50 | 0.02 (0-0.10) | 100% (92.8-100) |

Other infectious febrile illnesses sera consisted of melioidosis (n=12), scrub typhus (n=11), influenza (n=11), malaria (n=10), dengue fever (n=10), and other febrile illness whole blood (n=50)

1 Median AOD ELISA values (minimum-maximum values)

**Table** **2.** Diagnostic performances of commercial IgM-ELISA (Panbio) and IgG-ELISA (Virion-Serion) using optimized cut-offs and culture and/or MAT as reference standard during the course of leptospirosis.

| **Parameters1** | **Panbio IgM-ELISA2** | | **Virion-Serion IgG-ELISA3** | |
| --- | --- | --- | --- | --- |
| **No./total** | **Percent (95% CI)** | **No./total** | **Percent (95% CI)** |
| **Sensitivity: acute serum** | | | | |
| Culture-positive | 15/30 | 50.0% (31.3-68.7) | 4/30 | 13.3% (3.8-30.7) |
| MAT-negative | 24/38 | 63.2% (45.9-78.2) | 4/38 | 10.5% (2.9-24.8) |
| DPO1-3 | 17/31 | 54.8% (36.0-72.7) | 3/31 | 9.7% (2.0-25.8) |
| DPO1-10 | 31/52 | 61.5% (47.0-74.7) | 9/51 | 17.7% (8.4-30.9) |
| **Sensitivity: convalescent-serum** | | | | |
| DPO14 | 30/42 | 71.4% (55.4-84.3) | 23/47 | 48.9% (34.1-63.9) |
| **Specificity** |  |  |  |  |
| Controls | 84/97 | 86.6%(78.2-92.7) | 98/131 | 74.8%(66.5-84.9) |

1 The sensitivity of the ELISA tests was evaluated on culture-positive samples, MAT-negative (<1:50) of seroconversion MAT titer paired sera. Sensitivity was also determined during the course of illness from DPO1-3, DPO1-10 acute-sera, and DPO14 of convalescent sera. Specificity was determined from all control samples, including healthy, AUFI, and other febrile illnesses in leptospirosis-endemic areas.

2 Optimized cut-off for Panbio IgM-ELISA was 7 panbiounits. 3 Optimized cut-off for Virion-Serion IgG-ELISA was 0.35 OD ELISA.
